# Supplementary material
Source: PubMed Central journal article supplement (PMC8714027)

# Stark spectroscopy of Lumichrome - a possible candidate for stand-off detection of bacterial quorum sensing.

Cornelius van Galen, David T. Barnard, Robert J. Stanley\*

Department of Chemistry, 250B Beury Hall, 1901 North 13<sup>th</sup> Street, Temple University, Philadelphia PA 19122

Supporting Information

Table S1. Molecular geometry of Lumichrome optimized in the gas phase at the B3LYP/6-311+G(2d,p) level of theory using Gaussian16. A frequency calculation was conducted to verify that the optimized geometry is a minimum on the nuclear geometry potential energy surface. Coordinates are in angstroms.

| Atom | X         | Y         | Z         |
|------|-----------|-----------|-----------|
| C    | 3.908134  | 2.988834  | 0.000000  |
| C    | 2.547934  | 2.345093  | 0.000000  |
| C    | 1.366475  | 3.162481  | 0.000000  |
| C    | 0.133851  | 2.560858  | 0.000000  |
| C    | 0.000000  | 1.152087  | 0.000000  |
| C    | 1.175041  | 0.340892  | 0.000000  |
| C    | 2.435675  | 0.974576  | 0.000000  |
| H    | 3.317287  | 0.344753  | 0.000000  |
| N    | 1.088214  | -1.011596 | 0.000000  |
| C    | -0.120409 | -1.520622 | 0.000000  |
| N    | -0.245437 | -2.897479 | 0.000000  |
| C    | -1.440517 | -3.585008 | 0.000000  |
| N    | -2.567694 | -2.770965 | 0.000000  |
| C    | -2.636550 | -1.376029 | 0.000000  |
| C    | -1.299000 | -0.716646 | 0.000000  |
| N    | -1.228572 | 0.592992  | 0.000000  |
| O    | -3.699264 | -0.802759 | 0.000000  |
| H    | -3.451816 | -3.263606 | 0.000000  |
| O    | -1.508489 | -4.794555 | 0.000000  |
| H    | 0.597983  | -3.454754 | 0.000000  |
| H    | -0.777180 | 3.147367  | 0.000000  |
| C    | 1.481644  | 4.664027  | 0.000000  |
| H    | 2.024281  | 5.025421  | 0.878275  |
| H    | 0.496142  | 5.129128  | 0.000000  |
| H    | 2.024281  | 5.025421  | -0.878275 |
| H    | 4.047148  | 3.626584  | -0.877668 |
| H    | 4.697515  | 2.237690  | 0.000000  |
| H    | 4.047148  | 3.626584  | 0.877668  |

Table S2. Molecular geometry of Lumiflavin optimized in the gas phase at the B3LYP/6-311+G(2d,p) level of theory using Gaussian16. A frequency calculation was conducted to verify that the optimized geometry is a minimum on the nuclear geometry potential energy surface. Coordinates are in angstroms.

| Atom | X         | Y         | Z          |
|------|-----------|-----------|------------|
| C    | -0.039452 | 0.000000  | 0.004482   |
| C    | 2.070364  | -0.000148 | -1.916940  |
| C    | 4.650650  | -0.000178 | -1.143382  |
| C    | 5.320818  | -0.000083 | 1.627970   |
| H    | 4.543741  | 1.663658  | 2.592499   |
| H    | 4.543930  | -1.663882 | 2.592558   |
| H    | 7.368622  | 0.000034  | 1.910397   |
| C    | 6.577083  | -0.000304 | -2.941022  |
| C    | 6.033327  | -0.000413 | -5.541686  |
| C    | 3.466394  | -0.000379 | -6.322184  |
| C    | 1.539611  | -0.000249 | -4.480369  |
| H    | -0.395867 | -0.000231 | -5.164934  |
| N    | 2.798667  | -0.000458 | -8.820730  |
| C    | 4.583776  | -0.000594 | -10.506800 |
| C    | 7.287552  | -0.000652 | -9.925361  |
| N    | 7.902593  | -0.000533 | -7.382632  |
| C    | 10.577272 | -0.000528 | -6.639793  |
| H    | 10.993135 | -1.690684 | -5.523249  |
| H    | 10.993152 | 1.689686  | -5.523345  |
| H    | 11.708303 | -0.000589 | -8.355484  |
| N    | 9.106723  | -0.000722 | -11.599637 |
| C    | 8.523321  | -0.000693 | -14.143567 |
| N    | 5.938596  | -0.000584 | -14.833383 |
| C    | 3.864879  | -0.000914 | -13.248821 |
| O    | 1.696205  | -0.000364 | -14.027161 |
| H    | 5.583823  | -0.000450 | -16.719859 |
| O    | 10.117677 | -0.000711 | -15.810672 |
| H    | 8.520417  | -0.000321 | -2.294477  |
| H    | 0.045121  | 1.666263  | 1.237181   |
| H    | -1.884347 | -0.000144 | -0.927904  |
| H    | 0.045206  | -1.665991 | 1.237539   |

Table S3. First 10 excited states of gas phase Lumichrome calculated at the B3LYP/6-311+G(2d,p) level of theory using Gaussian16.

| Excited State | Wavelength (nm) | Oscillator Strength |
|---------------|-----------------|---------------------|
| 1             | 367.00          | 0.0649              |
| 2             | 362.79          | 0.0011              |
| 3             | 321.84          | 0.2235              |
| 4             | 311.12          | 0.0001              |
| 5             | 258.57          | 0.0290              |
| 6             | 254.38          | 0.0000              |
| 7             | 250.81          | 0.0000              |
| 8             | 248.89          | 0.2674              |
| 9             | 243.26          | 0.0000              |
| 10            | 240.99          | 0.2555              |

Table S4. First 10 excited states of gas phase Lumiflavin calculated at the B3LYP/6-311+G(2d,p) level of theory using Gaussian16.

| Excited State | Wavelength (nm) | Oscillator Strength |
|---------------|-----------------|---------------------|
| 1             | 412.92          | 0.1993              |
| 2             | 391.09          | 0.0003              |
| 3             | 373.81          | 0.0003              |
| 4             | 325.27          | 0.1464              |
| 5             | 315.72          | 0.0000              |
| 6             | 306.18          | 0.0110              |
| 7             | 268.28          | 0.0002              |
| 8             | 264.81          | 0.0936              |
| 9             | 256.45          | 0.5767              |
| 10            | 249.32          | 0.0329              |

Table S5. Transition dipole moments ( $\vec{m}$ ) and difference permanent dipole moments ( $\Delta\vec{\mu}$ ) of the two lowest experimentally-measurable electronic transitions of gas phase Lumichrome and Lumiflavin calculated at the B3LYP/6-311+G(2d,p) level of theory using Gaussian16. Vector components are given in the above standard orientation. The finite field method was used to compute the difference permanent dipole moments. Coordinates are in units of Debye.

| Compound   | Transition      | Vector            | X     | Y     | Z    |
|------------|-----------------|-------------------|-------|-------|------|
| Lumichrome | S <sub>10</sub> | $\vec{m}$         | -0.83 | 0.29  | 0.00 |
|            |                 | $\Delta\vec{\mu}$ | -1.43 | 1.22  | 0.00 |
|            | S <sub>30</sub> | $\vec{m}$         | -1.44 | -0.53 | 0.00 |
|            |                 | $\Delta\vec{\mu}$ | -5.36 | -0.26 | 0.00 |
| Lumiflavin | S <sub>10</sub> | $\vec{m}$         | -1.58 | -0.47 | 0.00 |
|            |                 | $\Delta\vec{\mu}$ | -1.17 | 1.33  | 0.00 |
|            | S <sub>40</sub> | $\vec{m}$         | -1.25 | 0.10  | 0.00 |
|            |                 | $\Delta\vec{\mu}$ | -4.15 | 1.22  | 0.00 |

Figure S1. Standard Orientations of Lumichrome and Lumiflavin

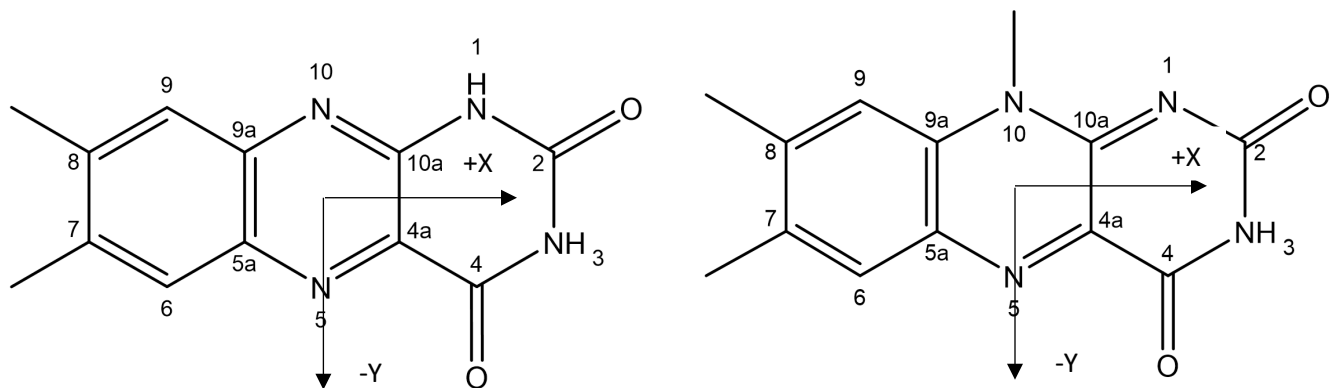

Figure S2. Possible orientations of the experimentally measured difference permanent dipole moments of the lumichrome  $S_{10}$  (red) and  $S_{30}$  (blue) transitions, relative to the theoretically determined transition dipole moments. In these figures, the solid lines represent the difference permanent dipole moment possibilities and the dotted line represent the transition dipole moment possibilities.

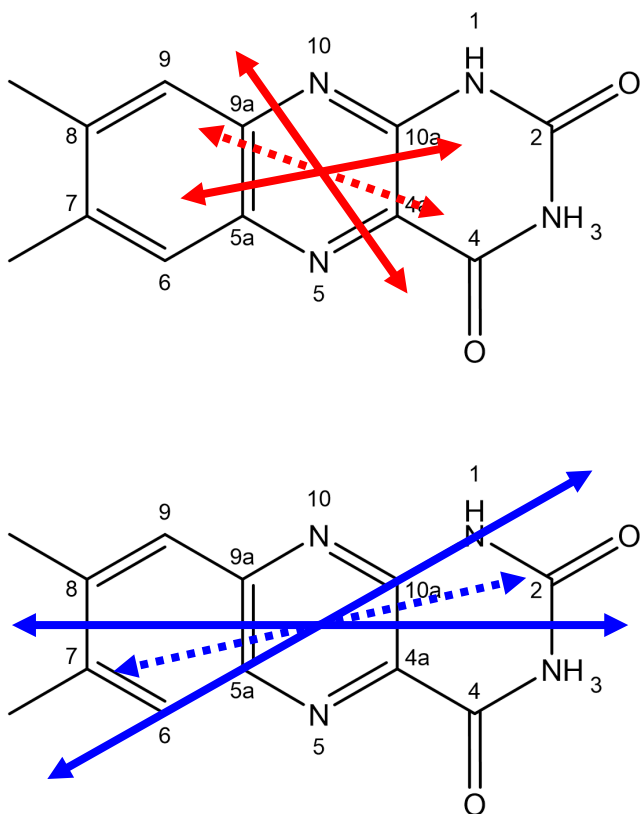

Supplement: NIHMS1764915-supplement-1.pdf [file NIHMS1764915-supplement-1.pdf]
